# Supplementary material for: Conversion of glucose to levulinic acid and upgradation to γ-valerolactone on Ru/TiO2 catalysts
Source: Royal Society of Chemistry journal article supplement (doi:10.1039/d1nj01990b), 2021-01-01
Supplement: d1nj01990b1.pdf [file d1nj01990b1.pdf]

## Supplementary Information for

### Conversion of glucose to levulinic acid and upgrade into $\gamma$ -valerolactone on Ru based catalysts

Yubo Liu<sup>a,b</sup>, Guoqiang Ding<sup>c</sup>, Guoping Zhao<sup>d</sup>, Haohao She<sup>a,b</sup>, Yulei Zhu<sup>\*,a,c</sup>, and Yong Yang<sup>a,c</sup>

<sup>a</sup> State Key Laboratory of Coal Conversion, Institute of Coal Chemistry, Chinese Academy of Sciences, Taiyuan 030001, PR China.

<sup>b</sup> University of Chinese Academy of Sciences, Beijing, 100049, PR China.

<sup>c</sup> Synfuels China Co. Ltd., Beijing, PR China.

<sup>d</sup>Key Laboratory of Precision Nutrition and Food Quality, Department of Nutrition and Health, China Agricultural University, Beijing 100083.

\*Corresponding author. E-mail: [zhuyulei@sxicc.ac.cn](mailto:zhuyulei@sxicc.ac.cn)

#### Table of contents

**Fig. S1** XRD patterns of the (a) fresh Ru/TiO<sub>2</sub> catalysts and (b) the supports.

**Fig. S2** The N<sub>2</sub> adsorption-desorption isotherms (a) and BJH pore size distribution (b) of different zeolites.

**Fig. S3** The NH<sub>3</sub>-TPD profiles of HZSM-5, H $\beta$ , and HY zeolite.

**Fig. S4** The Py-IR spectra of HZSM-5, H $\beta$ , and HY zeolite.

**Table S1** The textural data of various zeolites.

**Table S2** The different type of acid distribution over the zeolites.

## 1. Catalyst characterizations Methods

**X-ray diffraction (XRD) measurements.** Powder X-ray diffraction (XRD) patterns were collected on a Bruker D8 ADVANCE A25 X-ray diffractometer (Germany), with Cu K $\alpha$  radiation at 40 kV and 40 mA. The X ray patterns were recorded in  $2\theta$  values ranging from  $10^\circ$  to  $80^\circ$  with a scanning speed of  $4^\circ/\text{min}$ .

**IR spectra of adsorbed pyridine (Py-IR).** For each run, the samples were pressed into self-supporting wafers and degassed in vacuum at  $350^\circ\text{C}$  for 1 h followed by exposure to pyridine vapor. Subsequently, the Py-IR spectra were measured at the set temperature after applying vacuum for 30 min. Next, saturated adsorption of pyridine vapor on the samples was performed until an equilibrium was achieved. The quantification of Brønsted and Lewis acid sites was estimated from the integrated area of adsorption bands at ca.  $1540$  and  $1450\text{ cm}^{-1}$ , respectively. The concentrations of acid sites of different strengths in terms of temperature can be quantitatively determined from the amounts of pyridine desorbed at corresponding temperatures.

**NH<sub>3</sub>-TPD.** The acid amounts of zeolites were measured with thermal programmed desorption (TPD) of NH<sub>3</sub> on Auto Chem. II 2920 equipment (Micromeritics, USA) with a mass spectra. The samples (150 mg) were firstly placed in a U-shaped quartz tubular reactor and pretreated at  $350^\circ\text{C}$  in helium ( $20\text{ mL}/\text{min}$ ) for 1 h. Then the sample was adsorbed with NH<sub>3</sub> until saturation. Then, the zeolite was flushed with helium at  $100^\circ\text{C}$  for 0.5 h to remove the physisorbed NH<sub>3</sub>. TPD was conducted from  $100^\circ\text{C}$  to  $800^\circ\text{C}$  at a heat rate of  $10^\circ\text{C} / \text{min}$ .

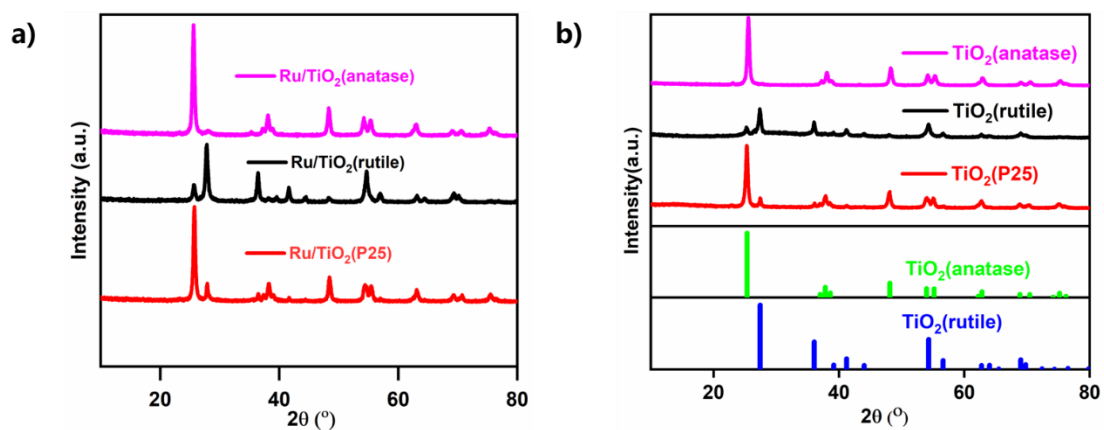

Fig. S1 XRD patterns of the (a) fresh Ru/TiO<sub>2</sub> catalysts and (b) the supports.

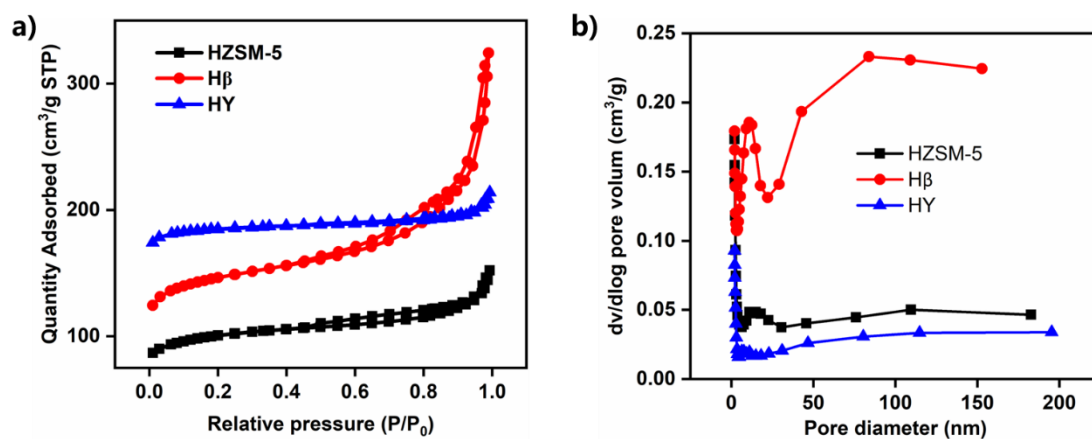

Fig. S2 The N<sub>2</sub> adsorption-desorption isotherms (a) and BJH pore size distribution (b) of different zeolites.

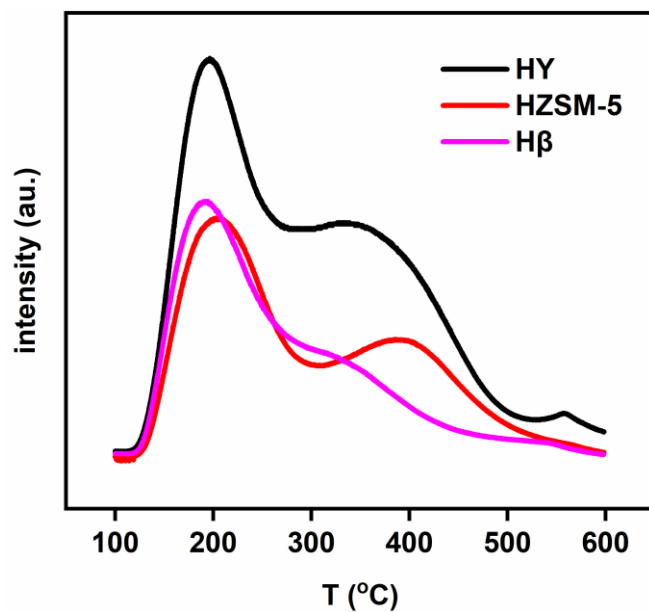

Fig. S3 The NH<sub>3</sub>-TPD profiles of HZSM-5, Hβ, and HY zeolite.

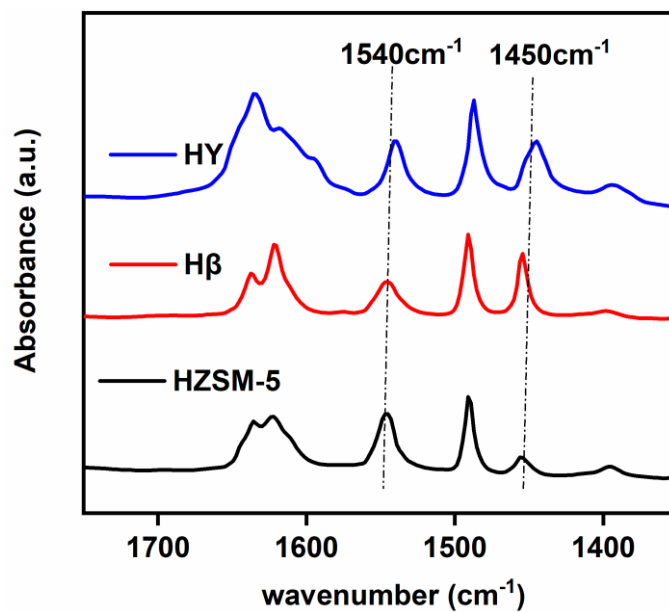

Fig. S4 The Py-IR spectra of HZSM-5, Hβ, and HY zeolite.

**Table S1** The textural data of various zeolites.

| Sample | Surface area (m <sup>2</sup> ·g <sup>-1</sup> ) |           |          | Pore volume (cm <sup>3</sup> ·g <sup>-1</sup> ) |           |          |
|--------|-------------------------------------------------|-----------|----------|-------------------------------------------------|-----------|----------|
|        | Total                                           | Micropore | External | Total                                           | Micropore | Mesopore |
| HZSM-5 | 328                                             | 229       | 98       | 0.22                                            | 0.11      | 0.11     |
| Hβ     | 479                                             | 333       | 146      | 0.49                                            | 0.16      | 0.33     |
| HY     | 588                                             | 536       | 52       | 0.32                                            | 0.26      | 0.06     |

**Table S2** The different type of acid distribution over the zeolites.

| catalysts | 100 °C                  |       | 100 °C ~ 200 °C |       | 200 °C                  |       | 200 °C ~ 350 °C |       | 350 °C      |        |
|-----------|-------------------------|-------|-----------------|-------|-------------------------|-------|-----------------|-------|-------------|--------|
|           | (mmol·g <sup>-1</sup> ) |       | weak acid       |       | (mmol·g <sup>-1</sup> ) |       | moderate strong |       | strong acid |        |
|           | L                       | B     | L               | B     | L                       | B     | L               | B     | L           | B      |
| HZSM-5    | 0.078                   | 0.138 | 0.046           | 0.042 | 0.032                   | 0.096 | 0.017           | 0.022 | 0.015       | 0.074  |
| Hβ        | 0.153                   | 0.185 | 0.141           | 0.142 | 0.012                   | 0.043 | 0.0011          | 0.032 | 0.0107      | 0.0112 |
| HY        | 0.297                   | 0.410 | 0.270           | 0.019 | 0.031                   | 0.391 | 0.0195          | 0.123 | 0.012       | 0.268  |
